# Supplementary material for: Natural thioallyl compounds increase oxidative stress resistance and lifespan in Caenorhabditis elegans by modulating SKN-1/Nrf
Source: PubMed Central journal article supplement (PMC4761942; doi:10.1038/srep21611), 2016-02-22
Supplement: srep21611-s1.pdf [file srep21611-s1.pdf]

## Supplementary Information

### Natural thioallyl compounds increase oxidative stress resistance and lifespan in *Caenorhabditis elegans* by modulating SKN-1/Nrf

Takahiro Ogawa<sup>a,b,\*</sup>, Yukihiro Kodera<sup>b</sup>, Dai Hirata<sup>a</sup>, T. Keith Blackwell<sup>c</sup>, and Masaki Mizunuma<sup>a,\*</sup>

<sup>a</sup> Department of Molecular Biotechnology, Graduate School of Advanced Sciences of Matter, Hiroshima University, Higashi-Hiroshima 739-8530, Japan

<sup>b</sup> Drug Discovery Laboratory, Wakunaga Pharmaceutical Co., Ltd, Hiroshima 739-1195, Japan

<sup>c</sup> Joslin Diabetes Center, Harvard Stem Cell Institute, and Harvard Medical School Department of Genetics, Boston, MA 02215, USA

\* Correspondence to

Takahiro Ogawa (e-mail: [ogawa\\_t@wakunaga.co.jp](mailto:ogawa_t@wakunaga.co.jp))

Masaki Mizunuma (email: [mmizu49120@hiroshima-u.ac.jp](mailto:mmizu49120@hiroshima-u.ac.jp))

#### **Table of contents**

|                                                                                   |     |
|-----------------------------------------------------------------------------------|-----|
| <b>Figure S1.</b> Effect of SAC and SAMC on the proteasome activity.....          | P2  |
| <b>Figure S2.</b> Effect of OSCs on oxidative stress resistance.....              | P3  |
| <b>Figure S3.</b> Effect of OSCs on heat stress resistance.....                   | P4  |
| <b>Table S1.</b> Lifespans of wild-type shown in Figs. 1b and 1c.....             | P5  |
| <b>Table S2.</b> Lifespans of <i>daf-16(mgDf47)</i> shown in Figs. 2d and 2e..... | P6  |
| <b>Table S3.</b> Lifespans of <i>skn-1(zu135)</i> shown in Figs. 3c and 3d.....   | P7  |
| <b>Table S4.</b> Nematode strains used in this study.....                         | P8  |
| <b>Table S5.</b> Primer sequences used in qRT-PCR analysis.....                   | P8  |
| <b>Supplementary Methods.</b> 26S proteasome activity assays.....                 | P9  |
| <b>Supplementary References</b> .....                                             | P10 |

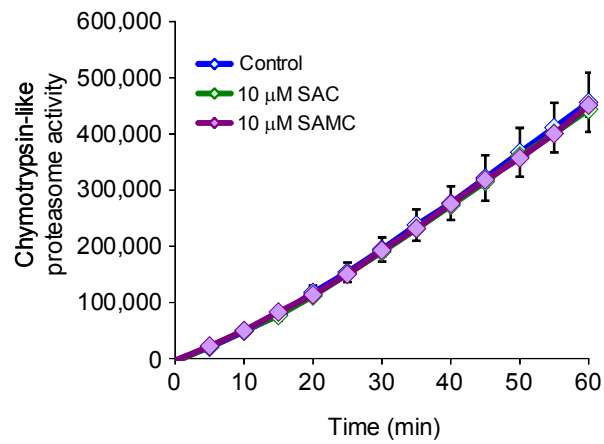

**Figure S1. Effect of SAC and SAMC on the proteasome activity.** The 26S proteasome activity in whole lysate (25 μg per sample) prepared using about 1,000 wild-type animals treated on the L1 stage with H<sub>2</sub>O (control), SAC or SAMC for 4 days at 20°C. Data represent mean ± SD (n = 3 of 1,000 animals).

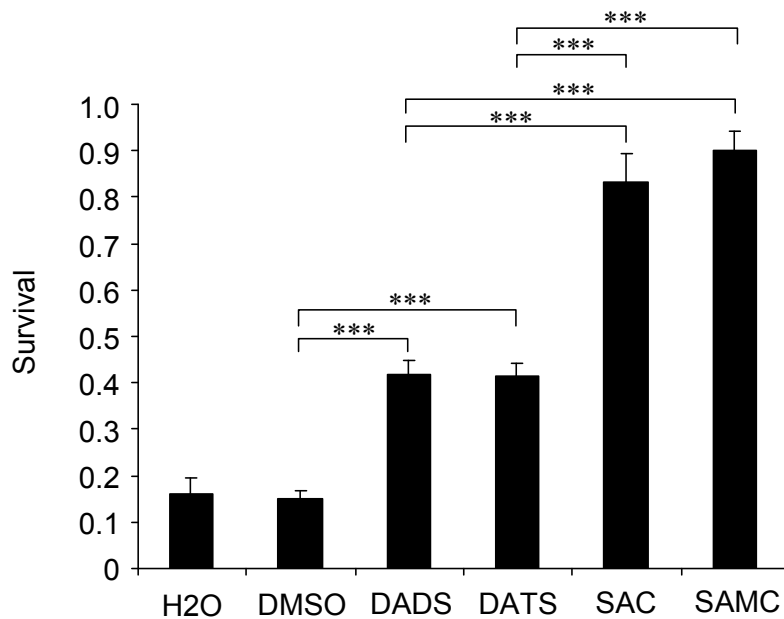

**Figure S2. Effect of OSCs on oxidative stress resistance.** Synchronized day-1 wild-type adults were treated with H<sub>2</sub>O (control for SAC and SAMC), 0.02 % DMSO (control for DADS and DATS), DADS, DATS, SAC or SAMC for 48 hours at 20°C and then subjected to oxidative stress (250 μM juglone for 2 hours at 20°C). Each compound was treated at 10 μM. Survivals after the oxidative stress treatment were scored after a 16 hours recovery on NGM agar seeded with *E. coli* OP50. Data are represented as mean ± SD from three independent experiments. Total number of animals tested (H<sub>2</sub>O, n=185; DMSO, n=199; DADS, n=198; DATS, n=200; SAC, n=217; SAMC, n=242). \*\*\**P*<0.001 (one-way ANOVA with Tukey's post hoc test).

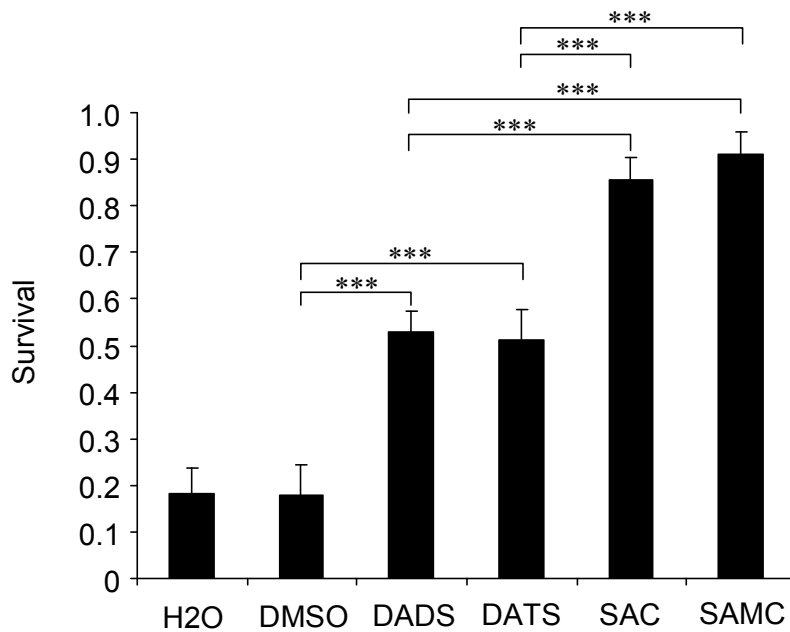

**Figure S3. Effect of OSCs on heat stress resistance.** Synchronized day-1 wild-type adults were treated with H<sub>2</sub>O (control for SAC and SAMC), 0.02 % DMSO (control for DADS and DATS), DADS, DATS, SAC or SAMC for 48 hours at 20°C and then subjected to heat stress (35°C for 7 hours). Each compound was treated at 10 μM. Survivals after the oxidative stress treatment were scored after a 16 hours recovery on NGM agar seeded with *E. coli* OP50. Data are represented as mean ± SD from three independent experiments. Total number of animals tested (H<sub>2</sub>O, n=173; DMSO, n=166; DADS, n=194; DATS, n=211; SAC, n=231; SAMC, n=224). \*\*\**P*<0.001 (one-way ANOVA with Tukey's post hoc test).

**Table S1. Lifespans of wild-type shown in Figs. 1b and 1c.**

| Trial                                    | Treatment<br>( $\mu$ M) | No.<br>animals | Censored | Mean lifespan <sup>1)</sup> |                |                                             | Maximum lifespan <sup>2)</sup> |                                             |
|------------------------------------------|-------------------------|----------------|----------|-----------------------------|----------------|---------------------------------------------|--------------------------------|---------------------------------------------|
|                                          |                         |                |          | days $\pm$<br>SEM           | %<br>extension | <i>P</i> value vs.<br>control <sup>3)</sup> | days $\pm$<br>SEM              | <i>P</i> value vs.<br>control <sup>4)</sup> |
| 1st                                      | Control                 | 81             | 3        | 20.9 $\pm$ 0.6              | N/A            | N/A                                         | 35                             |                                             |
|                                          | SAC (1)                 | 85             | 4        | 22.3 $\pm$ 0.5              | 6.5%           | 0.171                                       | 32                             |                                             |
|                                          | SAC (10)                | 80             | 3        | 23.8 $\pm$ 0.6              | 13.8%          | 0.003                                       | 48                             |                                             |
|                                          | SAC (100)               | 70             | 9        | 23.8 $\pm$ 0.6              | 13.5%          | 0.001                                       | 37                             |                                             |
| 2nd                                      | Control                 | 106            | 4        | 21.6 $\pm$ 0.4              | N/A            | N/A                                         | 32                             |                                             |
|                                          | SAC (1)                 | 100            | 2        | 23.1 $\pm$ 0.4              | 7.3%           | 0.080                                       | 37                             |                                             |
|                                          | SAC (10)                | 83             | 5        | 24.1 $\pm$ 0.4              | 11.6%          | 0.001                                       | 37                             |                                             |
|                                          | SAC (100)               | 92             | 11       | 23.7 $\pm$ 0.4              | 10.1%          | 0.007                                       | 32                             |                                             |
|                                          | SAMC (1)                | 94             | 3        | 22.8 $\pm$ 0.4              | 5.7%           | 0.136                                       | 32                             |                                             |
|                                          | SAMC (10)               | 94             | 11       | 25.1 $\pm$ 0.5              | 16.4%          | <0.001                                      | 43                             |                                             |
|                                          | SAMC (100)              | 90             | 10       | 24.9 $\pm$ 0.5              | 15.3%          | <0.001                                      | 42                             |                                             |
| 3rd                                      | Control                 | 54             | 0        | 21.9 $\pm$ 0.7              | N/A            | N/A                                         | 35                             |                                             |
|                                          | SAC (1)                 | 61             | 2        | 23.6 $\pm$ 0.6              | 7.7%           | 0.196                                       | 31                             |                                             |
|                                          | SAC (10)                | 62             | 7        | 26.2 $\pm$ 0.7              | 20.0%          | <0.001                                      | 50                             |                                             |
|                                          | SAC (100)               | 56             | 7        | 26.1 $\pm$ 0.5              | 19.3%          | 0.002                                       | 34                             |                                             |
|                                          | SAMC (1)                | 69             | 3        | 23.4 $\pm$ 0.6              | 7.1%           | 0.262                                       | 46                             |                                             |
|                                          | SAMC (10)               | 68             | 3        | 25.5 $\pm$ 0.8              | 16.6%          | 0.002                                       | 58                             |                                             |
|                                          | SAMC (100)              | 60             | 5        | 24.9 $\pm$ 0.6              | 13.9%          | 0.012                                       | 33                             |                                             |
| 4th                                      | Control                 | 53             | 0        | 20.7 $\pm$ 0.7              | N/A            | N/A                                         | 37                             |                                             |
|                                          | SAC (1)                 | 49             | 2        | 22.5 $\pm$ 0.8              | 8.9%           | 0.159                                       | 35                             |                                             |
|                                          | SAC (10)                | 59             | 0        | 26.2 $\pm$ 0.6              | 26.7%          | <0.001                                      | 33                             |                                             |
|                                          | SAC (100)               | 61             | 3        | 25.4 $\pm$ 0.7              | 23.2%          | <0.001                                      | 35                             |                                             |
|                                          | SAMC (1)                | 50             | 2        | 21.5 $\pm$ 0.7              | 4.1%           | 0.521                                       | 30                             |                                             |
|                                          | SAMC (10)               | 58             | 4        | 26.1 $\pm$ 0.6              | 26.1%          | <0.001                                      | 37                             |                                             |
|                                          | SAMC (100)              | 63             | 3        | 27.2 $\pm$ 0.6              | 31.6%          | <0.001                                      | 37                             |                                             |
| 5th                                      | Control                 | 49             | 2        | 21.3 $\pm$ 0.6              | N/A            | N/A                                         | 32                             |                                             |
|                                          | SAMC (1)                | 59             | 1        | 21.9 $\pm$ 0.6              | 2.7%           | 0.683                                       | 31                             |                                             |
|                                          | SAMC (10)               | 54             | 5        | 25.6 $\pm$ 0.7              | 20.0%          | <0.001                                      | 38                             |                                             |
|                                          | SAMC (100)              | 55             | 6        | 26.3 $\pm$ 0.7              | 23.5%          | <0.001                                      | 38                             |                                             |
| Combined<br>(Trial 1~5)<br>Fig. 1b and c | Control                 | 343            | 9        | 21.3 $\pm$ 0.3              | N/A            | N/A                                         | 34.8 $\pm$ 1.0                 | N/A                                         |
|                                          | SAC (1)                 | 295            | 10       | 22.9 $\pm$ 0.3              | 7.5%           | <0.001                                      | 33.8 $\pm$ 1.4                 | 0.989                                       |
|                                          | SAC (10)                | 284            | 15       | 24.9 $\pm$ 0.3              | 17.0%          | <0.001                                      | 42.0 $\pm$ 4.1                 | 0.171                                       |
|                                          | SAC (100)               | 279            | 30       | 24.6 $\pm$ 0.3              | 15.6%          | <0.001                                      | 34.5 $\pm$ 1.0                 | 0.999                                       |
|                                          | SAMC (1)                | 272            | 9        | 22.5 $\pm$ 0.3              | 5.8%           | 0.024                                       | 34.8 $\pm$ 3.8                 | 1.000                                       |
|                                          | SAMC (10)               | 274            | 23       | 25.5 $\pm$ 0.3              | 19.7%          | <0.001                                      | 44.0 $\pm$ 4.8                 | 0.236                                       |
|                                          | SAMC (100)              | 268            | 24       | 25.7 $\pm$ 0.3              | 20.9%          | <0.001                                      | 37.5 $\pm$ 1.8                 | 0.971                                       |

1) Mean lifespan is the day when 50% of worms survived.

2) Maximum lifespan is the day when the last surviving worm died.

3) *P*-values for mean lifespan were obtained by log-rank test by comparing the control and other treated groups.

4) *P*-values for maximum lifespan were calculated by one-way ANOVA with Tukey's post hoc test from means of the maximum lifespan of each condition.

**Table S2. Lifespans of *daf-16(mgDf47)* shown in Figs. 2d and 2e.**

| Trial                                    | Treatment (μM) | No. animals | Censored | Mean lifespan <sup>1)</sup> |             |                                          | Maximum lifespan <sup>2)</sup> |                                          |
|------------------------------------------|----------------|-------------|----------|-----------------------------|-------------|------------------------------------------|--------------------------------|------------------------------------------|
|                                          |                |             |          | days ± SEM                  | % extension | <i>P</i> value vs. control <sup>3)</sup> | days ± SEM                     | <i>P</i> value vs. control <sup>4)</sup> |
| 1st                                      | Control        | 41          | 2        | 12.3 ± 0.5                  | N/A         | N/A                                      | 18                             |                                          |
|                                          | SAC (1)        | 41          | 2        | 12.8 ± 0.4                  | 4.2%        | 0.873                                    | 18                             |                                          |
|                                          | SAC (10)       | 42          | 1        | 13.8 ± 0.3                  | 12.2%       | 0.089                                    | 20                             |                                          |
|                                          | SAC (100)      | 41          | 0        | 13.9 ± 0.3                  | 13.4%       | 0.048                                    | 20                             |                                          |
|                                          | SAMC (1)       | 42          | 3        | 12.4 ± 0.5                  | 1.3%        | 0.719                                    | 20                             |                                          |
|                                          | SAMC (10)      | 41          | 3        | 12.8 ± 0.5                  | 4.8%        | 0.537                                    | 22                             |                                          |
|                                          | SAMC (100)     | 42          | 3        | 13.2 ± 0.3                  | 7.7%        | 0.368                                    | 18                             |                                          |
| 2nd                                      | Control        | 80          | 0        | 11.7 ± 0.4                  | N/A         | N/A                                      | 18                             |                                          |
|                                          | SAC (1)        | 79          | 0        | 12.2 ± 0.4                  | 4.3%        | 0.551                                    | 21                             |                                          |
|                                          | SAC (10)       | 75          | 0        | 13.4 ± 0.4                  | 14.2%       | 0.008                                    | 18                             |                                          |
|                                          | SAC (100)      | 80          | 4        | 12.7 ± 0.4                  | 8.2%        | 0.148                                    | 19                             |                                          |
|                                          | SAMC (1)       | 85          | 0        | 11.4 ± 0.4                  | -3.1%       | 0.501                                    | 18                             |                                          |
|                                          | SAMC (10)      | 81          | 1        | 13.0 ± 0.3                  | 10.6%       | 0.081                                    | 20                             |                                          |
|                                          | SAMC (100)     | 80          | 1        | 13.1 ± 0.3                  | 11.6%       | 0.039                                    | 19                             |                                          |
| 3rd                                      | Control        | 69          | 0        | 11.4 ± 0.4                  | N/A         | N/A                                      | 20                             |                                          |
|                                          | SAC (1)        | 66          | 0        | 11.3 ± 0.4                  | -0.6%       | 0.607                                    | 18                             |                                          |
|                                          | SAC (10)       | 68          | 2        | 12.7 ± 0.4                  | 11.2%       | 0.061                                    | 22                             |                                          |
|                                          | SAC (100)      | 70          | 3        | 13.7 ± 0.4                  | 20.4%       | <0.001                                   | 22                             |                                          |
|                                          | SAMC (1)       | 75          | 0        | 11.4 ± 0.4                  | -0.3%       | 0.578                                    | 22                             |                                          |
|                                          | SAMC (10)      | 86          | 0        | 13.1 ± 0.3                  | 15.3%       | 0.004                                    | 21                             |                                          |
|                                          | SAMC (100)     | 80          | 3        | 13.8 ± 0.4                  | 21.5%       | <0.001                                   | 23                             |                                          |
| Combined<br>(Trial 1~3)<br>Fig. 2d and e | Control        | 190         | 2        | 11.7 ± 0.3                  | N/A         | N/A                                      | 18.7 ± 0.7                     | N/A                                      |
|                                          | SAC (1)        | 186         | 2        | 12.0 ± 0.2                  | 2.6%        | 0.756                                    | 19.0 ± 1.0                     | 0.994                                    |
|                                          | SAC (10)       | 185         | 3        | 13.2 ± 0.2                  | 12.8%       | <0.001                                   | 20.0 ± 1.2                     | 0.754                                    |
|                                          | SAC (100)      | 191         | 7        | 13.3 ± 0.2                  | 13.8%       | <0.001                                   | 20.3 ± 0.9                     | 0.616                                    |
|                                          | SAMC (1)       | 202         | 3        | 11.6 ± 0.2                  | -1.2%       | 0.481                                    | 20.0 ± 1.2                     | 0.808                                    |
|                                          | SAMC (10)      | 208         | 4        | 13.0 ± 0.2                  | 11.1%       | 0.002                                    | 21.0 ± 0.6                     | 0.447                                    |
|                                          | SAMC (100)     | 202         | 7        | 13.4 ± 0.2                  | 14.5%       | <0.001                                   | 20.0 ± 1.5                     | 0.808                                    |

1) Mean lifespan is the day when 50% of worms survived.

2) Maximum lifespan is the day when the last surviving worm died.

3) *P*-values for mean lifespan were obtained by log-rank test by comparing the control and other treated groups.

4) *P*-values for maximum lifespan were calculated by one-way ANOVA with Tukey's post hoc test from means of the maximum lifespan of each condition.

**Table S3. Lifespans of *skn-1(zu135)* shown in Figs. 3c and 3d.**

| Trial                                    | Treatment (μM) | No. animals | Censored | Mean lifespan <sup>1)</sup> |             |                                          | Maximum lifespan <sup>2)</sup> |                                          |
|------------------------------------------|----------------|-------------|----------|-----------------------------|-------------|------------------------------------------|--------------------------------|------------------------------------------|
|                                          |                |             |          | days ± SEM                  | % extension | <i>P</i> value vs. control <sup>3)</sup> | days ± SEM                     | <i>P</i> value vs. control <sup>4)</sup> |
| 1st                                      | Control        | 32          | 0        | 17.3 ± 1.1                  | N/A         | N/A                                      | 37                             |                                          |
|                                          | SAC (10)       | 32          | 0        | 18.0 ± 1.1                  | 3.6%        | 0.779                                    | 34                             |                                          |
|                                          | SAC (100)      | 32          | 1        | 16.4 ± 0.8                  | -5.7%       | 0.405                                    | 27                             |                                          |
|                                          | SAMC (10)      | 32          | 0        | 18.5 ± 1.4                  | 6.7%        | 0.469                                    | 39                             |                                          |
|                                          | SAMC (100)     | 32          | 2        | 15.8 ± 1.0                  | -9.1%       | 0.337                                    | 28                             |                                          |
| 2nd                                      | Control        | 49          | 0        | 15.9 ± 0.7                  | N/A         | N/A                                      | 28                             |                                          |
|                                          | SAC (10)       | 50          | 1        | 16.7 ± 0.8                  | 5.0%        | 0.409                                    | 37                             |                                          |
|                                          | SAC (100)      | 53          | 1        | 14.5 ± 0.5                  | -9.1%       | 0.041                                    | 23                             |                                          |
|                                          | SAMC (10)      | 51          | 0        | 16.4 ± 0.9                  | 2.6%        | 0.704                                    | 37                             |                                          |
|                                          | SAMC (100)     | 52          | 0        | 13.9 ± 0.6                  | -12.8%      | 0.020                                    | 28                             |                                          |
| 3rd                                      | Control        | 59          | 0        | 18.5 ± 0.6                  | N/A         | N/A                                      | 36                             |                                          |
|                                          | SAC (10)       | 53          | 4        | 17.8 ± 0.6                  | -3.9%       | 0.525                                    | 32                             |                                          |
|                                          | SAC (100)      | 57          | 6        | 15.9 ± 0.5                  | -13.8%      | 0.002                                    | 27                             |                                          |
|                                          | SAMC (10)      | 54          | 3        | 17.2 ± 0.6                  | -7.1%       | 0.137                                    | 34                             |                                          |
|                                          | SAMC (100)     | 56          | 1        | 16.1 ± 0.5                  | -12.7%      | 0.004                                    | 27                             |                                          |
| Combined<br>(Trial 1~3)<br>Fig. 3c and d | Control        | 140         | 0        | 17.3 ± 0.4                  | N/A         | N/A                                      | 33.7 ± 2.8                     | N/A                                      |
|                                          | SAC (10)       | 135         | 5        | 17.4 ± 0.5                  | 0.5%        | 0.853                                    | 34.3 ± 1.5                     | 0.970                                    |
|                                          | SAC (100)      | 142         | 8        | 15.5 ± 0.3                  | -10.8%      | <0.001                                   | 25.7 ± 1.3                     | 0.067                                    |
|                                          | SAMC (10)      | 137         | 3        | 17.2 ± 0.5                  | 0.9%        | 0.855                                    | 36.7 ± 1.5                     | 0.525                                    |
|                                          | SAMC (100)     | 140         | 3        | 15.2 ± 0.4                  | -12.3%      | <0.001                                   | 27.7 ± 0.3                     | 0.134                                    |

1) Mean lifespan is the day when 50% of worms survived.

2) Maximum lifespan is the day when the last surviving worm died.

3) *P*-values for mean lifespan were obtained by log-rank test by comparing the control and other treated groups.

4) *P*-values for maximum lifespan were calculated by one-way ANOVA with Tukey's post hoc test from means of the maximum lifespan of each condition.

**Table S4. Nematode strains used in this study.**

| Number | Genetic background    | Transgene                   | Array number | Referenced                           |
|--------|-----------------------|-----------------------------|--------------|--------------------------------------|
| N2     | Wild-type             |                             |              |                                      |
| CF1553 | N2                    | Is[ <i>sod-3p::GFP</i> ]    |              | (1) Libina <i>et al.</i> , 2003      |
| CL2070 | N2                    | Is[ <i>hsp-16.2p::GFP</i> ] |              | (2) Link <i>et al.</i> , 1999        |
| CL2166 | N2                    | Is[ <i>gst-4p::GFP</i> ]    |              | (3) Link and Johnson, 2002           |
|        | <i>daf-16(mgDf47)</i> |                             |              | (4) Ogg <i>et al.</i> , 1997         |
| LD1482 | <i>daf-16(mu86)</i>   | Is[ <i>DAF-16A::GFP</i> ]   |              | (5) Lin <i>et al.</i> , 2001         |
| CL691  | <i>skn-1(zu67)</i>    | Is[ <i>gst-4p::GFP</i> ]    |              | (6) Rea <i>et al.</i> , 2007         |
| EU31   | <i>skn-1(zu135)</i>   |                             |              | (7) Bowerman <i>et al.</i> , 1992    |
| LD001  | N2                    | Is[ <i>SKN-1B/C::GFP</i> ]  | 007          | (8) An & Blackwell, 2003             |
| KU4    | <i>sek-1(km4)</i>     |                             |              | (9) Tanaka-Hino <i>et al.</i> , 2002 |
| NL2099 | <i>rrf-3(pk1426)</i>  |                             |              | (10) Simmer <i>et al.</i> , 2002     |

**Table S5. Primer sequences used in qRT-PCR analysis.**

| Gene name       | Forward primer sequence (5'-3') | Reverse primer sequence (5'-3') |
|-----------------|---------------------------------|---------------------------------|
| <i>act-1</i>    | ACCATGTACCCAGGAATTGC            | TGGAAGGTGGAGAGGGAAG             |
| <i>sod-3</i>    | AGCATCATGCCACCTACGTGA           | CACCACCATTGAATTCAGCG            |
| <i>hsp-16.2</i> | CTCAACGTTCCGTTTTTGGT            | CGTTGAGATTGATGGCAAAC            |
| <i>ctl-2</i>    | TCCGTGACCCTATCCACTTC            | TGGGATCCGTATCCATTCAT            |
| <i>gst-4</i>    | CGTTTTCTATGGAAGTGACGC           | TCAGCCCAAGTCAATGAGTC            |
| <i>gcs-1</i>    | TGTTGATGTGGATACTCGGTG           | TGTATGCAGGATGAGATTGTACG         |
| <i>gst-10</i>   | GTCTACCACGTTTTGGATGC            | ACTTTGTCGGCCTTTCTCTT            |
| <i>atf-5</i>    | CCATCAATCTTATCAACAGCATCAT       | CTGGTGAACCGAAGTG                |
| <i>haf-7</i>    | GACGTGGAAAAGCTGAGAGG            | GCAGGGAAAATGTGAGGAAA            |
| <i>rpt-3</i>    | CCCAAGAGGAGTTCTCATGTA           | ATGAAGGAAGCAGCAGTATT            |
| <i>rpn-12</i>   | CTGCCAACAGATTGTCCG              | GCGTAGAGATGTAAGCG               |
| <i>pas-4</i>    | CGAGCCATCTGGAGCTTACTA           | TCCTCAAGGTATTCACGCAC            |
| <i>pbs-6</i>    | TGGACAGAGCCATCTCATT             | CTTCAGCGATGACCAAGTG             |
| <i>skn-1</i>    | AGTGTCGGCGTTCCAGATTTC           | GTCGACGAATCTTGCGAATCA           |



## **Supplementary Methods**

### **26S proteasome activity assays**

The 26S proteasome activity in whole animal lysate was measured as previously described (11). Briefly, after treating L1 larvae with H<sub>2</sub>O (control), SAC or SAMC (10 μM each) for 4 days at 20°C, adult animals were sonicated in 4 volumes of lysis buffer (50 mM Tris-HCl, pH 7.5, 250 mM sucrose, 5 mM MgCl<sub>2</sub>, 2 mM ATP, 1 mM dithiothreitol and 0.5 mM EDTA) with a Bioruptor UCW310 (BM Equipment, Tokyo, Japan). Lysate was centrifuged at 14,000 X g for 10 min at 4°C. To measure chymotrypsin-like proteasome activity, 25 μg of whole animal lysate was transferred to a 96-well microtitre plate, then incubated with a fluorogenic peptide substrate (100 μM Suc-Leu-Leu-Val-Tyr-AMC, Boston Biochemicals, MA) in proteasome activity assay buffer (50 mM Tris-HCl, pH 7.5, 40 mM KCl, 5 mM MgCl<sub>2</sub>, 0.5 mM ATP, 1 mM dithiothreitol and 0.05 mg mL<sup>-1</sup> BSA) at 25°C. The fluorescence intensity was measured at 380 nm for excitation and 460 nm for emission using an EnVision 2104 multilabel reader (PerkinElmer, Waltham, MA) every 5 min for 1 hour at 25°C. The assay was performed in the absence or presence of proteasome inhibitor (40 μM Epoxomicin, Peptide Institute, Osaka, Japan) to calculate the 26S proteasome-specific activity.

### Supplementary References

- (1) Libina, N., Berman, J. R. & Kenyon, C. Tissue-specific activities of *C. elegans* DAF-16 in the regulation of lifespan. *Cell* **115**, 489-502 (2003).
- (2) Link, C. D., Cypser, J. R., Johnson, C. J. & Johnson, T. E. Direct observation of stress response in *Caenorhabditis elegans* using a reporter transgene. *Cell Stress Chaperones* **4**, 235-242 (1999).
- (3) Link, C. D. & Johnson, C. J. Reporter transgenes for study of oxidant stress in *Caenorhabditis elegans*. *Methods Enzymol.* **353**, 497-505 (2002).
- (4) Ogg, S. *et al.* The Fork head transcription factor DAF-16 transduces insulin-like metabolic and longevity signals in *C. elegans*. *Nature* **389**, 994-999 (1997).
- (5) Lin, K., Hsin, H., Libina, N. & Kenyon, C. Regulation of the *Caenorhabditis elegans* longevity protein DAF-16 by insulin/IGF-1 and germline signaling. *Nat. Genet.* **28**, 139-145 (2001).
- (6) Rea, S. L., Ventura, N. & Johnson, T. E. Relationship between mitochondrial electron transport chain dysfunction, development, and life extension in *Caenorhabditis elegans*. *PLoS Biol.* **5**, e259 (2007).
- (7) Bowerman, B., Eaton, B. A. & Priess, J. R. *skn-1*, a maternally expressed gene required to specify the fate of ventral blastomeres in the early *C. elegans* embryo. *Cell* **68**, 1061-1075 (1992).
- (8) An, J. H. & Blackwell, T. K. SKN-1 links *C. elegans* mesendodermal specification to a conserved oxidative stress response. *Genes dev.* **17**, 1882-1893 (2003).
- (9) Tanaka-Hino, M. *et al.* SEK-1 MAPKK mediates Ca<sup>2+</sup> signaling to determine neuronal asymmetric development in *Caenorhabditis elegans*. *EMBO Rep.* **3**, 56-62 (2002).
- (10) Simmer, F. *et al.* Loss of the putative RNA-directed RNA polymerase RRF-3 makes *C. elegans* hypersensitive to RNAi. *Curr. Biol.* **12**, 1317-1319 (2002).
- (11) Kisselev, A. F. & Goldberg, A. L. Monitoring activity and inhibition of 26S proteasomes with fluorogenic peptide substrates. *Methods Enzymol.* **398**, 364-378 (2005).
